# Supplementary material for: Gold nanocrystal-mediated sliding of doublet DNA origami filaments
Source: PubMed Central journal article supplement (PMC5899135; doi:10.1038/s41467-018-03882-w), 2018-04-13
Supplement: 41467_2018_3882_MOESM2_ESM.pdf [file 41467_2018_3882_MOESM2_ESM.pdf]

## **Description of Additional Supplementary Files**

File Name: Supplementary Data 1

Description: Detailed sequence information of all the DNA strands.
